# Supplementary material
Source: Springer Nature journal article supplement (https://www.springermedizin.de/resource/supplementary/12906_2011_465_MOESM7_ESM.pdf/9519546)

**RAW264.7**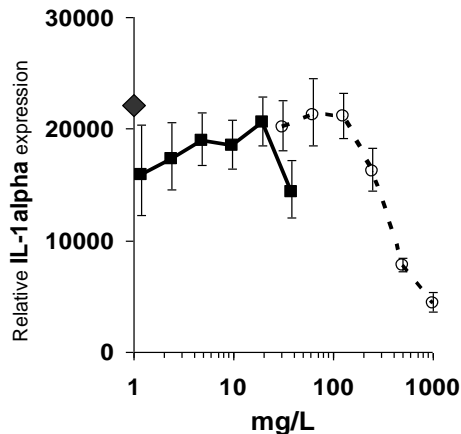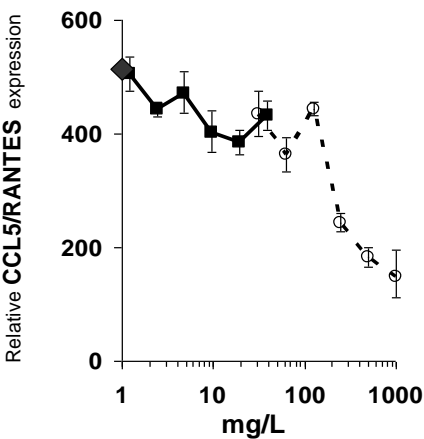**PBL**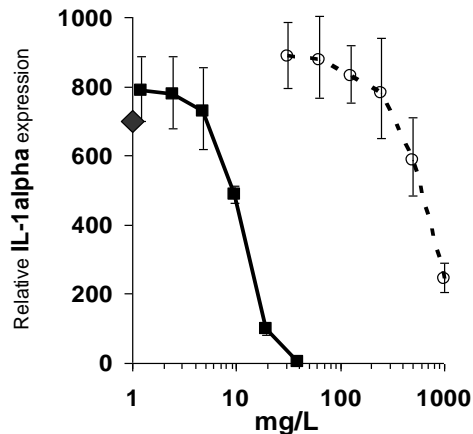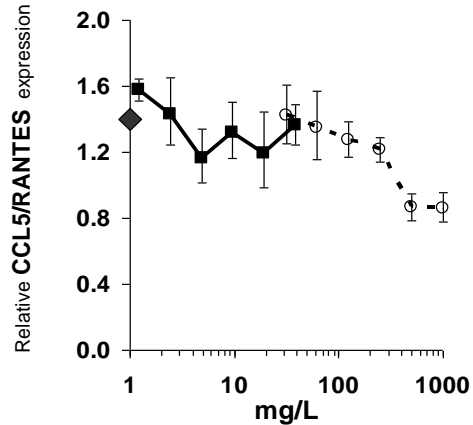**NHAC-kn**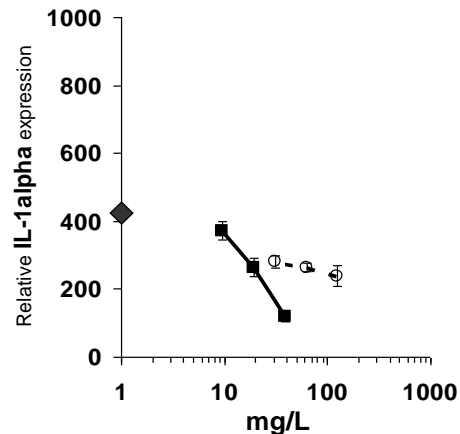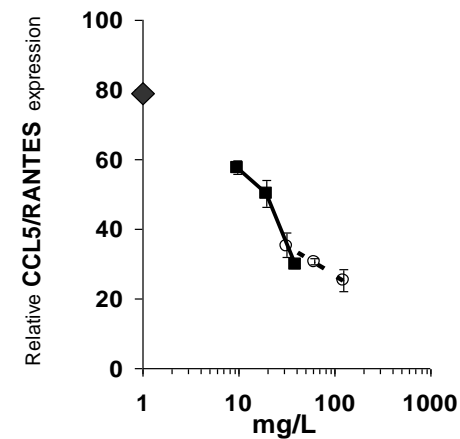

■ GLGPG    ○ RH

Supplement: MOESM7 [file 9519546]
